# Supplementary material for: Mechanical stimulation of Schwann cells promote peripheral nerve regeneration via extracellular vesicle-mediated transfer of microRNA 23b-3p
Source: PubMed Central journal article supplement (PMC7415818; doi:10.7150/thno.44912), 2020-07-11
Supplement: thnov10p8974s1.pdf [file thnov10p8974s1.pdf]

## Supplementary Figures

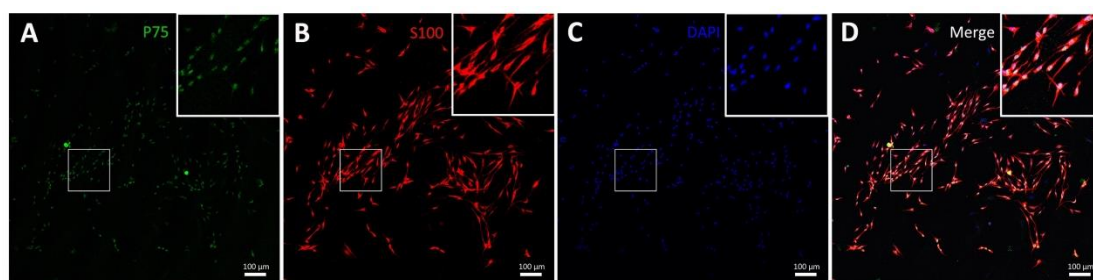

**Figure S1: Characterization of primary SCs.**

Double immunofluorescent staining showed the expression of p75 (A) and S100 (B) with DAPI nuclear counterstaining (C). Merge file (D).

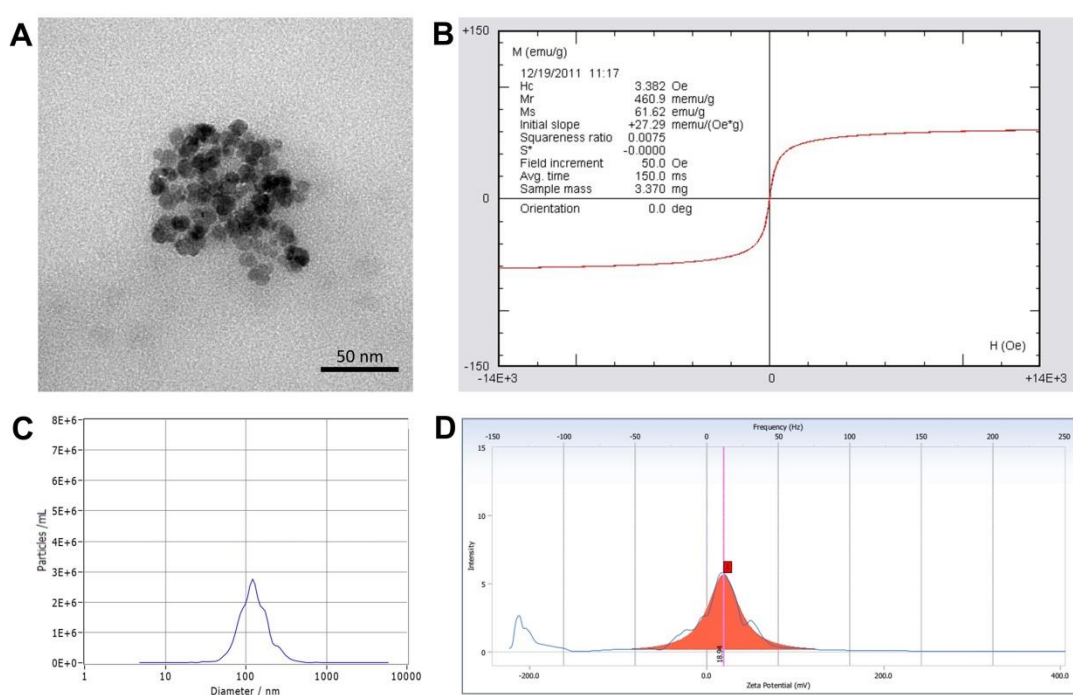

**Figure S2: Characterization of SPIONs.**

A: TEM analysis of SPIONs. B: Magnetization parameters of SPIONs. C: The overall distribution of SPIONs sizes. (D) The zeta potential of SPIONs.

**Supplementary Table 1: siRNA sets used for knockdown Nrp1**

| siRNA            | Location          | Sense(5'-3')              | Antisense(5'-3')          |
|------------------|-------------------|---------------------------|---------------------------|
| Nrp1-siRN<br>A 1 | Nrp1-rat-997      | GCACCUACUGGAGUGAUAA<br>TT | UUAUCACUCCAGUAGGUGC<br>TT |
| Nrp1-siRN<br>A 2 | Nrp1-rat-156<br>6 | GGGUGCCAUUCCAAGGAA<br>TT  | UCCCUUGGAAAUGGCACCCT<br>T |
| Nrp1-siRN<br>A 3 | Nrp1-rat-322      | CCUGGAGAACUAUAACUUU<br>TT | AAAGUUAUAGUUCUCCAGG<br>TT |

**Supplementary Table 2: Primer sets used for qRT-PCR**

| Primer                  | Sequence(5'-3')         |
|-------------------------|-------------------------|
| Nrp1-Forward            | GCGTGTCTTGCTGCACAAAT    |
| Nrp1-Reverse            | GGGTGCTCCCTGTTTCATCTAT  |
| U6-Forward              | CTCGCTTCGGCAGCACATATACT |
| U6- Reverse             | ACGCTTCACGAATTTGCGTGTC  |
| $\beta$ -actin- Forward | TAGTTGCGTTACACCCTTTCTTG |
| $\beta$ -actin- Reverse | TCACCTTCACCGTTCCAGTTT   |
